# Supplementary material for: Disparities in time to breast cancer surgery in New Zealand by level of neighborhood deprivation: a population-based study
Source: Research Square preprint supplement (doi:10.21203/rs.3.rs-6256299/v1), 2025-05-05
Supplement: Supplementary file 1 [file 28704f6a416e6560d72228a1.docx]

**Supplementary tables**

**Supplementary table 1. Census variables included in NZDep2018**

| **NZDep2018a** |
| --- |
| People with no access to Internet at home |
| People aged 18-64 receiving a means tested benefit |
| People living in equivalised households with income below an income threshold |
| People aged 18-64 who are unemployed |
| People aged 18-64 without any qualifications |
| People not living in their own home |
| People aged under 65 living in a single parent family |
| People living in equivalisedhouseholds below a bedroom occupancy threshold |
| People living in dwellings that are always damp and/or have mould greater than A4 size |

1. The variables differ slightly by census year, 2018 is shown here as an example [12].

**Supplementary table 2. Categorisation of variables**

| **Domain** | **Covariates** | **Categorisationa** | | **Comments / Definitions** |
| --- | --- | --- | --- | --- |
|  |  | <45 years  **≥ 45 to ≤ 69 years**  >69 years | | Reference group is the screening age-group |
| Demographic | Age | Reference group is the screening age-groupb |
|  | Region | **Auckland**  Waikato  Christchurch  Wellington | Main urban area | Minor urban area | Secondary urban area | Inlet  | Inland Water  Rural | Rural centre  Tis N0 M0  T1 N0 M0  T0 N1 M0 | T1 N1 M0 | T2 N0 M0  T2 N1 M0 | T3 N0 M0  T0 N2 M0 | T1 N2 M0 | T2 N2 M0 | T3 N1 M0 | T3 N2 M0  T4 Any N M0  Any T N3 M0  Any T Any N M1  Low  Intermediate  High  8500/3 – Invasive carcinoma / Ductal no special type / Invasive ductal carcinoma with medullary features | 8522/4 – Pleiomorphic ductal carcinoma | 8211/3 – Tubular ductal carcinoma  8520/3 – Invasive lobular carcinoma | 8035/3 – Lobular carcinoma with osteoclast giant cells |  |
|  | Ethnicity | **NZ European**  Māori  Asian  Pacific |  |
|  | Area of Residence | **Urban**  Rural  Unknown | Based on NZ Statistics Rural/Urban classification50  Urban includes: main urban area | minor urban area | secondary urban area | inlet  Rural includes: rural | rural centre |
|  |  |  |  |
| Mode of diagnosis | Mode of diagnosis | **Screened**  Symptomatic |  |
|  |  |  |  |
|  |  |  | American Joint Commission on Cancer 7th edition – s |
| Tumour factors | TNM stage | 0  **1**  2a  2b  3a  3b  3c  4 | American Joint Commission on Cancer 7th edition48 – see Table 2 for definitions |
|  | Grade | **1**  2  3  Unknown |  |
|  | Morphology | **Ductal**  Lobular  Mixed  Other  Unknown |  |
|  | ER/PR | **ER+/PR+**  ER+/PR-  ER-/PR+  ER-/PR-  Unknown, |  |
|  | HER | **Negative**  Equivocal  Positive  Unknown | Immunohistochemical analysis (IHC) used as primary assay; Fluorescence in-situ hybridization used for IHC equivocal results |
|  |  |  |  |
| Treatment facility type | Treatment facility type | **Public**  Private  Unknown |  |
|  |  |  |  |
| Treatment factors | Radiotherapy | **Yes**  No  Unknown |  |
|  | Locoregional therapy | **BCS with RT** Wide local excision | lumpectomy  BCS without RT Wide local excision | lumpectomy  Mastectomy | |  |
|  | Systemic therapy | **Yes**  No | Chemotherapy | Endocrine therapy | Biologics |

**Supplementary table 3. Sensitivity analysis - logistic regression models for time to surgery, by deprivation including adjustment for comorbidities**

| **Model** | **NZ Dep 1-2**  (n=1,142) | **NZ Dep 3-4**  (n=1,143) | **NZ Dep 5-6**  (n=1,090) | **NZ Dep 7-8**  (n=1,036) | **NZ Dep 9-10**  (n=707) |
| --- | --- | --- | --- | --- | --- |
| **Reference** | **OR (95% CI)** | | |  |
| Maximally adjusteda  Maximally adjusted + comorbidity scoreb | 1.00  1.00 | 1.24 (1.03, 1.48)  1.24 (1.03, 1.48) | 1.08 (0.90, 1.30)  1.08 (0.89, 1.30) | 1.25 (1.03, 1.52)  1.25 (1.03, 1.52) | 1.41(1.12, 1.78)  1.40 (1.11, 1.77) |

1. Maximally adjusted model includes adjustment for demographic factors (age, region, ethnicity, area of residence), mode of diagnosis, tumour factors (stage, grade, morphology, ER/PR - oestrogen/progesterone receptors, HER - Human Epidermal Growth Factor Receptor), treatment facility type and treatment factors (locoregional treatment, systemic therapy)
2. Comorbidity score using Charlson Comorbidity Indexcategorized as: 0, 1-2, 3-4 and ≥5 [13].
